# Supplementary material for: The Prognostic Role of Glasgow Prognostic Score and C-reactive Protein to Albumin Ratio for Sarcoma: A System Review and Meta-Analysis
Source: Hindawi journal article supplement (doi:10.1155/2020/8736509), 2020-01-07
Supplement: f1 [file 8736509.f1.zip]

## Supplementary Materials

PRISMA 2009 checklist.

Appendix A: Full search strategy of Embase and MEDLINE using OVIDsp.

Appendix B: Full search strategy of Cochrane library.

**Appendix A:** Full search strategy of Embase and MEDLINE using OVIDsp.

| #  | Searches (Keyword)                                                                                                                | Results | Search Type |
|----|-----------------------------------------------------------------------------------------------------------------------------------|---------|-------------|
| 1  | (Glasgow prognostic score and sarcoma).mp. [mp=ti, ab, hw, tn, ot, dm, mf, dv, kw, fx, dq, nm, kf, ox, px, rx, ui, sy]            | 27      | Advanced    |
| 2  | (GPS and sarcoma).mp. [mp=ti, ab, hw, tn, ot, dm, mf, dv, kw, fx, dq, nm, kf, ox, px, rx, ui, sy]                                 | 36      | Advanced    |
| 3  | (C-reactive protein to albumin ratio and sarcoma).mp. [mp=ti, ab, hw, tn, ot, dm, mf, dv, kw, fx, dq, nm, kf, ox, px, rx, ui, sy] | 6       | Advanced    |
| 4  | (CAR and sarcoma).mp. [mp=ti, ab, hw, tn, ot, dm, mf, dv, kw, fx, dq, nm, kf, ox, px, rx, ui, sy]                                 | 263     | Advanced    |
| 5  | (C-reactive protein and sarcoma).mp. [mp=ti, ab, hw, tn, ot, dm, mf, dv, kw, fx, dq, nm, kf, ox, px, rx, ui, sy]                  | 635     | Advanced    |
| 6  | (CRP and sarcoma).mp. [mp=ti, ab, hw, tn, ot, dm, mf, dv, kw, fx, dq, nm, kf, ox, px, rx, an, ui, sy]                             | 234     | Advanced    |
| 7  | (albumin and sarcoma).mp. [mp=ti, ab, hw, tn, ot, dm, mf, dv, kw, fx, dq, nm, kf, ox, px, rx, ui, sy]                             | 1228    | Advanced    |
| 8  | (ALB and sarcoma).mp. [mp=ti, ab, hw, tn, ot, dm, mf, dv, kw, fx, dq, nm, kf, ox, px, rx, an, ui, sy]                             | 23      | Advanced    |
| 9  | 1 or 2 or 3 or 4 or 5 or 6 or 7 or 8                                                                                              | 2151    | Advanced    |
| 10 | remove duplicates from 9                                                                                                          | 1731    | Advanced    |
| 11 | limit 10 to english language                                                                                                      | 1644    | Advanced    |
| 12 | limit 11 to human                                                                                                                 | 1238    | Advanced    |

The latest search was performed on December 17, 2019.

**Appendix B:** Full search strategy of Cochrane library.

| # | Searches (Keyword)                              | Results | Search Type     |
|---|-------------------------------------------------|---------|-----------------|
| 1 | Glasgow prognostic score and sarcoma            | 0       | Advanced Search |
| 2 | GPS and sarcoma                                 | 0       | Advanced Search |
| 3 | C-reactive protein to albumin ratio and sarcoma | 0       | Advanced Search |
| 4 | CAR and sarcoma                                 | 0       | Advanced Search |
| 5 | C-reactive protein and sarcoma                  | 4       | Advanced Search |
| 6 | CRP and sarcoma                                 | 0       | Advanced Search |
| 7 | albumin and sarcoma                             | 10      | Advanced Search |
| 8 | ALB and sarcoma                                 | 0       | Advanced Search |
| 9 | 1 or 2 or 3 or 4 or 5 or 6 or 7 or 8            | 14      | Advanced Search |
