# Supplementary material for: The Prognostic Role of Glasgow Prognostic Score and C-reactive Protein to Albumin Ratio for Sarcoma: A System Review and Meta-Analysis
Source: Dis Markers. 2020 Jan 7;2020:8736509. doi: 10.1155/2020/8736509 (PMC6969993; doi:10.1155/2020/8736509)
Supplement: Supplementary Materials — PRISMA 2009 checklist. Appendix A: full search strategy of Embase and MEDLINE using OVIDsp. Appendix B: full search strategy of Cochrane Library. [file 8736509.f1.zip]

Archive with 2 entries (2 files):
- matt.pdf
- new supplementa 1.pdf
